# Supplementary material
Source: publisher site journal article supplement (https://www.spandidos-publications.com/8638/downloadSupplementary)
Supplement: Supplementary file 1 [file downloadSupplementary]

Table SI. Multitarget anticancer activities of Tan IIA and its derivatives in breast cancer models: Concentration context and translational interpretation.

| Mechanism category                                                | Compound/form                                                | Key molecules/pathways                                                                                                              | Antitumor effects                                                                                                                                                                 | Study models                                                                | Dose/concentration                                                                                                                          | Translational interpretation                                                                                                                      | (Ref.) |
|-------------------------------------------------------------------|--------------------------------------------------------------|-------------------------------------------------------------------------------------------------------------------------------------|-----------------------------------------------------------------------------------------------------------------------------------------------------------------------------------|-----------------------------------------------------------------------------|---------------------------------------------------------------------------------------------------------------------------------------------|---------------------------------------------------------------------------------------------------------------------------------------------------|--------|
| ER signaling                                                      | ATA; HTA as intracellular metabolite                         | ER $\alpha$ $\downarrow$ , polyubiquitinated ER $\alpha$ $\uparrow$ , ESR1 $\downarrow$ , GREB1 $\downarrow$ , ER $\beta$ unchanged | Preferentially inhibits ER-positive breast cancer cell growth through ER $\alpha$ downregulation and reduced ER-responsive transcription                                          | MCF-7, T-47D, MDA-MB-231; IMR-90 and C2C12 comparator cells                 | IC50 1.40 $\mu$ M in T-47D, 1.48 $\mu$ M in MCF-7 and 7.98 $\mu$ M in MDA-MB-231 cells; 6 $\mu$ M for mechanism assays                      | ER-positive, low-micromolar <i>in vitro</i> evidence; HTA binding is docking-supported and <i>in vivo</i> breast cancer validation remains needed | (21)   |
| Endocrine combination therapy and ER imaging                      | Tan IIA formulation/sulfotanshinone IIA sodium + fulvestrant | FUL-associated ER $\alpha$ $\downarrow$ ; 18F-FES uptake $\downarrow$                                                               | FUL + Tan IIA delayed ZR-75-1 xenograft growth and enabled early PET/CT response monitoring; Tan IIA alone was not significantly effective                                        | ZR-75-1 ER-positive xenografts in female Balb/c nude mice                   | Tan IIA 30 mg/kg i.v. every other day + FUL 250 mg/kg s.c. weekly for 21 days                                                               | Combination evidence from a single ER-positive xenograft model; Tan IIA's mechanistic contribution remains unclear                                | (37)   |
| ER-associated nanodelivery                                        | Tan-NH <sub>2</sub> ; Tan-Dox-MSN                            | ER-associated uptake; Dox delivery; energy-dependent endocytosis                                                                    | Improves tumor targeting and Dox delivery, suppresses MCF-7 xenograft growth, and inhibits T47D migration/invasion <i>in vitro</i> while reducing Dox-related toxicity indicators | MCF-7, T47D, MCF-10A cells; MCF-7 xenograft-bearing female BALB/c nude mice | Tan-NH <sub>2</sub> 1-50 $\mu$ g/ml <i>in vitro</i> ; Tan-NH <sub>2</sub> 1-5 $\mu$ g/ml for migration/invasion; Dox 2 mg/kg <i>in vivo</i> | Formulation-dependent evidence; ER expression in normal tissues and nanocarrier safety remain key translational concerns                          | (22)   |
| ER-independent proliferation/apoptosis regulation                 | Native Tan IIA                                               | p53 $\downarrow$ , Bcl-2 $\downarrow$ ; cerbB-2 unchanged                                                                           | Inhibits proliferation and induces apoptosis in ER-positive and ER-negative breast cancer models                                                                                  | MCF-7 and MDA-MB-231 cells; female nude mouse xenografts                    | 0.0625-1.0 $\mu$ g/ml <i>in vitro</i> ; IC50 0.25 $\mu$ g/ml; 30 mg/kg s.c. <i>in vivo</i>                                                  | <i>In vivo</i> -supported but broad antiproliferative/apoptotic evidence; PK/tumor exposure remains unclear                                       | (38)   |
| Dox chemosensitization and resistance attenuation                 | Native Tan IIA + Dox                                         | PTEN $\uparrow$ , p-AKT $\downarrow$ , P-gp $\downarrow$ , BCRP $\downarrow$ , MRP1 $\downarrow$                                    | Enhances Dox accumulation/apoptosis, suppresses xenograft growth and reduces Dox-related toxicity                                                                                 | MCF-7 and MCF-7/Dox cells; MCF-7 xenograft-bearing nude mice                | Tan IIA 20 $\mu$ g/ml + Dox 2 $\mu$ g/ml <i>in vitro</i> ; Tan IIA 10 mg/kg + Dox 5 mg/kg i.p. <i>in vivo</i>                               | Resistant-cell evidence is <i>in vitro</i> ; <i>in vivo</i> validation used MCF-7 xenografts and high Tan IIA exposure requires PK confirmation   | (42)   |
| Dox chemosensitization via $\beta$ -catenin nuclear translocation | Native Tan IIA + Dox                                         | Nuclear $\beta$ -catenin $\downarrow$ , c-Myc $\downarrow$ , E-cadherin $\uparrow$ , MMP-2/9 $\downarrow$                           | Enhances Dox sensitivity and inhibits proliferation/migration <i>in vitro</i>                                                                                                     | MCF-7, MCF-7/Dox cells                                                      | Tan IIA 20 $\mu$ g/ml + Dox 2 $\mu$ g/ml; WAY-262611 rescue assay                                                                           | High-concentration <i>in vitro</i> evidence; no <i>in vivo</i> validation in this study                                                           | (43)   |
| Taxol/paclitaxel                                                  | Native Tan IIA +                                             | Tau $\downarrow$                                                                                                                    | Produces mainly                                                                                                                                                                   | Taxol-resistant MCF-                                                        | Tan IIA 1-20 $\mu$ M +                                                                                                                      | <i>In vitro</i> , model-specific                                                                                                                  | (44)   |

|                                                             |                      |                                                                                                                                                            |                                                                                                              |                                                       |                                                                                                                                                            |                                                                                                                              |      |
|-------------------------------------------------------------|----------------------|------------------------------------------------------------------------------------------------------------------------------------------------------------|--------------------------------------------------------------------------------------------------------------|-------------------------------------------------------|------------------------------------------------------------------------------------------------------------------------------------------------------------|------------------------------------------------------------------------------------------------------------------------------|------|
| sensitization                                               | Taxol/paclitaxel     |                                                                                                                                                            | additive cytotoxicity and partially attenuates Taxol resistance <i>in vitro</i>                              | 7/Taxol cells                                         | Taxol 5-100 $\mu\text{M}$ ; IC50: Tan IIA 8.4 $\mu\text{M}$ , Taxol 23.7 $\mu\text{M}$                                                                     | evidence; additive rather than consistently synergistic effect                                                               |      |
| Tissue-context-dependent ERK1/2 regulation                  | Native Tan IIA + Dox | p-ERK1/2 $\downarrow$ in breast cancer cells but $\uparrow$ in AC16 myocardial cells; c-Myc/MMP-2/cleaved caspase-3 modulated accordingly                  | Enhances Dox antitumor effects and attenuates Dox-induced myocardial injury                                  | MCF-7, MDA-MB-231, AC16 cells; 4T1 tumor-bearing mice | Dox 2 $\mu\text{g/ml}$ + Tan IIA 0.02 mg/l in MCF-7, 0.6 mg/l in MDA-MB-231 and 0.02-5 mg/l in AC16 cells; <i>in vivo</i> : Dox 5 mg/kg + Tan IIA 10 mg/kg | Cell-type-specific ERK1/2 regulation; requires PK/tumor and cardiac exposure validation                                      | (45) |
| ABC transporter-mediated resistance and BCSC-like phenotype | Native Tan IIA + Dox | P-gp $\downarrow$ , BCRP $\downarrow$ , MRP1 $\downarrow$ , CD44+/CD24-/low phenotype $\downarrow$                                                         | Increases intracellular Dox accumulation, enhances apoptosis and reduces BCSC-like phenotype <i>in vitro</i> | MCF-7, MCF-7/Dox cells                                | Tan IIA 0.02 mg/l + Dox 2 $\mu\text{g/ml}$ for 24 h                                                                                                        | Low-concentration <i>in vitro</i> evidence; no <i>in vivo</i> validation or relapse-prevention data                          | (46) |
| Hypoxia-associated Dox chemoresistance and EMT              | Native Tan IIA + Dox | HIF-1 $\alpha$ $\downarrow$ , E-cadherin $\uparrow$ , vimentin $\downarrow$ ; TWIST implicated                                                             | Reverses hypoxia-induced Dox resistance and suppresses EMT-associated marker changes <i>in vitro</i>         | MCF-7 and HCC1937 cells under DFO-induced hypoxia     | DFO 100 $\mu\text{M}$ ; Tan IIA 10 $\mu\text{M}$ + Dox 0.2 $\mu\text{g/ml}$                                                                                | <i>In vitro</i> hypoxia-mimetic evidence; no <i>in vivo</i> or metastasis validation                                         | (47) |
| Derivative-associated cytotoxicity and apoptosis            | 1-hydroxy-Tan IIA    | DNA fragmentation; Bax/Bcl-2 $\uparrow$ and PARP cleavage in PC3 cells                                                                                     | Inhibits MCF-7 viability and induces apoptotic DNA fragmentation                                             | MCF-7 cells; PC3 mechanistic comparator cells         | IC50 21.81 $\pm$ 2.65 $\mu\text{g/ml}$ in MCF-7; PI assay 25 $\mu\text{g/ml}$ ; PC3 WB 12.5 and 25 $\mu\text{g/ml}$                                        | MCF-7 evidence is <i>in vitro</i> only; MDA-MB-231 was not analyzed and apoptosis-protein validation was mainly in PC3 cells | (19) |
| Apoptosis in MDA-MB-231 TNBC cells                          | Native Tan IIA       | Bax $\uparrow$ , Bcl-xL $\downarrow$ , p21 $\uparrow$ , caspase-8 $\uparrow$                                                                               | Inhibits proliferation and induces sub-G1/apoptosis in a dose- and time-dependent manner                     | MDA-MB-231 cells                                      | 1-30 $\mu\text{g/ml}$ for 24-72 h; IC50 34.14, 11.85 and 2.40 $\mu\text{g/ml}$ at 24, 48 and 72 h; WB at 6 and 12 $\mu\text{g/ml}$                         | Single-cell-line <i>in vitro</i> evidence; exposure-time dependence and <i>in vivo</i> relevance require validation          | (20) |
| Endoplasmic reticulum stress-mediated apoptosis             | Native Tan IIA       | Caspase-12 $\uparrow$ , GADD153/CHOP $\uparrow$ , cleaved caspase-3 $\uparrow$ , Bax/Bcl-xL ratio $\uparrow$ , p-p38/p-JNK $\uparrow$ , p-ERK $\downarrow$ | Induces endoplasmic reticulum stress-related apoptosis and sub-G1 accumulation <i>in vitro</i>               | BT-20 cells                                           | 0.25-8 $\mu\text{g/ml}$ ; IC50 3.3, 1.87 and 0.67 $\mu\text{g/ml}$ at 24, 48 and 72 h                                                                      | Single-cell-line <i>in vitro</i> evidence; sustained exposure and <i>in vivo</i> relevance require validation                | (50) |
| GPER/EGFR/ERK signaling                                     | Native Tan IIA       | GPER $\downarrow$ , EGFR $\downarrow$ , ERK1/2 $\downarrow$ , c-Fos $\downarrow$ , c-Jun $\downarrow$ , cyclin A2/D1 $\downarrow$                          | Inhibits proliferation/migration, induces apoptosis and                                                      | MDA-MB-231 cells; HEK293 comparator cells             | 1-100 $\mu\text{M}$ for proliferation; 5, 10 and 50 $\mu\text{M}$ for 48 h                                                                                 | Single-cell-line <i>in vitro</i> evidence; GPER involvement is                                                               | (51) |

|                                                           |                                                                   |                                                                                                                  |                                                                                                                                                                 |                                                                                             |                                                                                                                                                                                 |                                                                                                                                                                                               |      |
|-----------------------------------------------------------|-------------------------------------------------------------------|------------------------------------------------------------------------------------------------------------------|-----------------------------------------------------------------------------------------------------------------------------------------------------------------|---------------------------------------------------------------------------------------------|---------------------------------------------------------------------------------------------------------------------------------------------------------------------------------|-----------------------------------------------------------------------------------------------------------------------------------------------------------------------------------------------|------|
|                                                           |                                                                   | CDK2/4/6 ↓, caspase-3 ↑                                                                                          | suppresses G1/S-associated proteins <i>in vitro</i>                                                                                                             |                                                                                             | validation assays; G15 + 10 μM rescue                                                                                                                                           | docking/G15-supported and requires <i>in vivo</i> target validation                                                                                                                           |      |
| Apoptosis and LC3-II/Erb-B2/NF-κB-associated signaling    | Native Tan IIA                                                    | LC3-II ↓, Erb-B2 ↓, NF-κBp65 ↓, caspase-3 ↑                                                                      | Suppresses MDA-MB-231 xenograft growth; 60 mg/kg significantly reduced tumor weight                                                                             | MDA-MB-231 cells; female nude SCID mouse xenografts                                         | IC50 11.85 μg/ml at 48 h; WB at 3, 10 and 25 μg/ml; oral 20 or 60 mg/kg every other day for 90 days                                                                             | <i>In vivo</i> -supported but single-cell-line evidence; LC3-II change and high oral dosing require autophagy-flux and PK validation                                                          | (52) |
| TNBC apoptosis and network-predicted pathway modulation   | Native Tan IIA                                                    | Bcl-2 ↓, p53 ↑, p-p53 ↑; predicted p53/PI3K-AKT/MAPK/mTOR pathways                                               | Inhibits 4T1 proliferation/colony formation, induces apoptosis and suppresses tumor growth                                                                      | 4T1 cells; MCF-10A comparator cells; 4T1-bearing female BALB/c mice                         | 10-80 μM for viability; IC50 49.78 μM at 48 h; 12.5, 25 and 50 μM for mechanism assays; <i>in vivo</i> 10 mg/kg                                                                 | High-micromolar evidence; pathway/docking findings require biochemical and <i>in vivo</i> target-engagement validation                                                                        | (53) |
| Proliferation/apoptosis and gene-expression modulation    | Native Tan IIA                                                    | ADPRTL1 ↑, CDKN1A ↑, CYP1A1 ↑, MAP3K1 ↓, MMP7 ↓, CEACAM6 ↓; tumor caspase-3 ↑                                    | Inhibits MCF-7 proliferation/colony formation and suppresses ER-negative breast IDC xenograft growth                                                            | MCF-7 cells; ER-negative breast IDC orthotopic xenografts in female nude mice               | 0.0625-1.0 μg/ml <i>in vitro</i> ; IC50 0.25 μg/ml; 30 mg/kg s.c. three times/week for 10 weeks <i>in vivo</i>                                                                  | <i>In vivo</i> -supported but model-mismatched evidence; microarray-derived targets require functional validation                                                                             | (55) |
| Anti-invasion derivative activity                         | TA12, para-hydroxyphenyl-substituted Tan IIA imidazole derivative | ROS ↑, DNA damage/γH2AX ↑, p53 ↑, AKT ↓, p21 ↑, cyclin A ↓; FAK ↓, GSK3β ↑, MMP9 ↓; apoptosis markers modestly ↑ | Inhibits MDA-MB-231 proliferation, migration, invasion and metastatic dissemination in zebrafish xenografts; induces ROS-mediated DNA damage and S-phase arrest | MDA-MB-231 cells; L02 cells as normal-cell comparator; MDA-MB-231 zebrafish xenograft model | IC50 13.2±3.9 μM in MDA-MB-231 and 49.1±7.4 μM in L02 cells; migration/invasion assays used 3 and 6 μM; DNA-damage assays used 10 and 20 μM; zebrafish xenograft exposure: 5 μM | Derivative-specific activity supported by MDA-MB-231 and zebrafish models; mammalian PK, systemic toxicity, tumor exposure and efficacy in mammalian metastasis models remain to be validated | (54) |
| BCSC-like properties and inflammatory signaling           | Native Tan IIA                                                    | IL-6 ↓, STAT3/p-STAT3 ↓, nuclear NF-κB p65 ↓, cyclin D1 ↓                                                        | Inhibits MCF-7M proliferation, mammosphere formation and MCF-7M-initiated xenograft growth                                                                      | MCF-7 and MCF-7M CSC-like cells; female Balb/c nude mouse xenografts                        | 0.125-2.0 μg/ml; IC50 0.40 μg/ml in MCF-7M; <i>in vivo</i> 10-40 mg/kg i.p.                                                                                                     | Low-concentration CSC-like evidence; relapse prevention and broader subtype validation remain needed                                                                                          | (57) |
| BCSC-like stemness and adriamycin/doxorubicin sensitivity | Native Tan IIA                                                    | miR-125b ↓, STARD13 ↑, Oct3/4 ↓, ALDH1A1 ↓                                                                       | Reduces spheroid formation and tumor-initiating ability;                                                                                                        | MCF-7, MDA-MB-231, MCF-7-Adr cells; female athymic                                          | 2.5-20 μM <i>in vitro</i> ; 10 μM for rescue/adriamycin                                                                                                                         | Stemness-focused evidence; <i>in vivo</i> assay used <i>ex vivo</i> pretreatment                                                                                                              | (58) |

|                                                          |                                                       |                                                                                                                                                                                                  |                                                                                                                                                                                                                      |                                                                                                                                      |                                                                                                                                                                    |                                                                                                                                                                |      |
|----------------------------------------------------------|-------------------------------------------------------|--------------------------------------------------------------------------------------------------------------------------------------------------------------------------------------------------|----------------------------------------------------------------------------------------------------------------------------------------------------------------------------------------------------------------------|--------------------------------------------------------------------------------------------------------------------------------------|--------------------------------------------------------------------------------------------------------------------------------------------------------------------|----------------------------------------------------------------------------------------------------------------------------------------------------------------|------|
|                                                          |                                                       | CD24 <sup>-</sup> /CD44 <sup>+</sup> ↓,<br>Ki67 ↓, cleaved PARP<br>↑                                                                                                                             | enhances adriamycin<br>sensitivity and<br>attenuates MCF-7-Adr<br>resistance <i>in vitro</i>                                                                                                                         | BALB/c nude mice                                                                                                                     | assays; cells<br>pretreated with<br>10 μM for 72 h<br>before implantation                                                                                          | rather than systemic<br>dosing, and clinical<br>chemoresistance<br>relevance remains<br>uncertain                                                              |      |
| Ferroptosis induction via<br>KDM1A/PIAS4/SLC7A11<br>axis | Native Tan IIA                                        | KDM1A ↓, PIAS4 ↓,<br>SLC7A11<br>SUMOylation/stability<br>↓,<br>MDA/Fe <sup>2+</sup> /LDH/lipid<br>ROS ↑, GSH ↓                                                                                   | Promotes ferroptosis<br>and suppresses<br>proliferation, migration,<br>invasion, xenograft<br>growth and<br>experimental lung<br>metastasis                                                                          | MCF-7 and T47D<br>responsive cells;<br>MDA-MB-231/BT549<br>comparator cells;<br>BALB/c nude mouse<br>models                          | 25-200 μM<br><i>in vitro</i> ; 50 μM for<br>key mechanism<br>assays; 10 mg/kg<br>i.p. every two days<br><i>in vivo</i>                                             | Detailed mechanistic<br>evidence but high-<br>micromolar exposure and<br>subtype-specific<br>responsiveness require<br>PK/PD and broader<br>validation         | (61) |
| HER2-positive breast<br>cancer suppression               | ATA                                                   | HER2/EGFR ↓, p-<br>Akt/p-Stat3/p-NF-κB<br>↓, cyclin D1/A and<br>CDK2/4/6 ↓, p21 ↑,<br>cleaved PARP ↑, Bax<br>↑, Bcl-2/Bcl-xL ↓, p-<br>AMPK/p-ACC ↑,<br>FASN/p-ACLY ↓,<br>ROS/CHOP ↑,<br>VEGFR2 ↓ | Induces cell-cycle<br>arrest/apoptosis,<br>suppresses<br>HER2/EGFR survival<br>and metabolic<br>signaling, inhibits<br>MDA-MB-453<br>xenograft growth and<br>reduces HUVEC<br>angiogenic behavior<br><i>in vitro</i> | MDA-MB-453, SK-<br>BR-3, BT-474; MCF-<br>10A comparator cells;<br>HUVECs; MDA-MB-<br>453 xenografts in<br>female BALB/c nude<br>mice | 1-20 μM <i>in vitro</i> ;<br>IC50 1.97, 9.17<br>and 6.79 μM in<br>MDA-MB-453,<br>SK-BR-3 and BT-<br>474 cells;<br>35 mg/kg i.p. three<br>times/week <i>in vivo</i> | ATA-specific HER2-<br>overexpressing evidence;<br><i>in vitro</i> antiangiogenic<br>data and HER2-<br>low/therapy-resistant<br>relevance require<br>validation | (64) |
| G4 DNA stabilization and<br>DNA-damage response          | Compound 4, imidazole-<br>modified Tan IIA derivative | c-myc/K-<br>ras/VEGF/Bcl-2/Tel-<br>26 G4 stabilization;<br>γH2AX ↑; G-rich gene<br>transcription ↓                                                                                               | Induces DNA damage<br>and S-phase arrest;<br>suppresses<br>proliferation, migration,<br>invasion, zebrafish<br>dissemination and<br>angiogenesis-related<br>phenotypes                                               | MDA-MB-231 cells;<br>MCF-10A comparator<br>cells; HUVECs;<br>zebrafish<br>xenograft/angiogenesis<br>models                           | IC50 12.8 μM in<br>MDA-MB-231 and<br>95.7 μM in MCF-<br>10A; 2.5-20 μM<br>across functional<br>assays; zebrafish 5-<br>20 μM                                       | Derivative-specific<br>zebrafish/ <i>in vitro</i><br>evidence; mammalian<br>PK, toxicity and<br>metastasis validation<br>remain needed                         | (67) |

Translational interpretation reflects the degree to which the reported mechanism is supported by concentration range, model specificity, compound form and *in vivo* validation. Tan IIA, tanshinone IIA; ATA, acetyltanshinone IIA; HTA, hydroquinone tanshinone IIA; Dox, doxorubicin; BCSC, breast cancer stem cell; G4, G-quadruplex; PK/PD, pharmacokinetic/pharmacodynamic; ER, estrogen receptor.

Table SII. Quantitative comparison of representative Tan IIA derivatives and nanodelivery systems in breast cancer models.

| Category            | Compound/system                   | Structural or formulation feature                          | Main mechanism/action                                                                                                                                                          | Study models                                          | IC50/effective range                                                                                                                         | Selectivity or formulation advantage                                                                                                                                                          | <i>In vivo</i> evidence                                                                    | Key translational limitation                                                                                                                          | (Ref.)   |
|---------------------|-----------------------------------|------------------------------------------------------------|--------------------------------------------------------------------------------------------------------------------------------------------------------------------------------|-------------------------------------------------------|----------------------------------------------------------------------------------------------------------------------------------------------|-----------------------------------------------------------------------------------------------------------------------------------------------------------------------------------------------|--------------------------------------------------------------------------------------------|-------------------------------------------------------------------------------------------------------------------------------------------------------|----------|
| Comparator          | Native Tan IIA                    | Parent lipophilic diterpene quinone                        | Suppresses proliferation and induces apoptosis in ER-positive and ER-negative breast cancer models, associated with reduced p53 and Bcl-2 expression                           | MCF-7, MDA-MB-231 cells; female BALB/c nude mice      | 0.0625-1.0 µg/ml tested; IC50 ~0.25 µg/ml in both cell lines                                                                                 | Broad ER-positive and ER-negative activity; stronger than tamoxifen in the tested ER-positive model                                                                                           | 30 mg/kg s.c., four times/week for 4 weeks inhibited MCF-7 and MDA-MB-231 xenograft growth | Poor solubility, low oral bioavailability and short half-life; breast tumor exposure and target coverage remain uncertain                             | (18, 38) |
| Compound            | ATA                               | Acetylated Tan IIA derivative                              | Promotes ER $\alpha$ degradation via the ubiquitin-proteasome pathway, reduces ESR1 transcription and suppresses ER-responsive genes                                           | MCF-7, T-47D, MDA-MB-231 cells                        | IC50 ~1.4-1.5 µM in ER-positive cells; 1.56-25 µM tested; 6 µM used for mechanistic studies                                                  | Preferential inhibition of ER-positive breast cancer cells under tested conditions; lower growth inhibition was observed in non-cancerous IMR-90 fibroblast and C2C12 muscle cells at 3.13 µM | NR for standalone ATA in ER-positive xenografts in the reviewed study                      | ER $\alpha$ degradation evidence is mainly based on ATA/HTA in ER-positive models; <i>in vivo</i> exposure and target engagement require validation   | (21)     |
| Compound/metabolite | HTA                               | Intracellular metabolic product of ATA identified by LC-MS | Computational docking suggests potential ER $\alpha$ binding; ATA/HTA-associated activity is linked to ER $\alpha$ degradation and suppression of ESR1 and GREB1 transcription | MCF-7 ER-positive breast cancer mechanistic model     | NR as standalone IC50; HTA was detected after 10 µM ATA treatment for 2 h; 6 µM ATA was used for ER $\alpha$ /ESR1/GREB1 mechanistic studies | Mechanistically linked to ATA activity and predicted to show preferential ER $\alpha$ binding over other nuclear receptors in docking analysis                                                | NR                                                                                         | HTA-specific cellular potency, direct biochemical ER $\alpha$ binding, independent PK profile and <i>in vivo</i> target engagement remain unvalidated | (21)     |
| Compound            | ATA in HER2-overexpressing models | Acetylated derivative with HER2/EGFR and metabolic pathway | Downregulates EGFR/HER2-AKT/STAT3/NF- $\kappa$ B signaling,                                                                                                                    | MDA-MB-453, SK-BR-3, BT-474, MCF-10A and HUVEC cells; | IC50: 1.97 µM in MDA-MB-453, 9.17 µM in SK-BR-3, 6.79 µM in                                                                                  | Higher IC50 in MCF-10A than in HER2-overexpressing                                                                                                                                            | Suppressed MDA-MB-453 xenograft tumor growth without                                       | ATA-specific evidence; anti-angiogenic and HER2-                                                                                                      | (64)     |

|                      |                                                                               |                                                                               |                                                                                                                                                                 |                                                                                                  |                                                                                                                                                |                                                                                                             |                                                                                                       |                                                                                                                                          |      |
|----------------------|-------------------------------------------------------------------------------|-------------------------------------------------------------------------------|-----------------------------------------------------------------------------------------------------------------------------------------------------------------|--------------------------------------------------------------------------------------------------|------------------------------------------------------------------------------------------------------------------------------------------------|-------------------------------------------------------------------------------------------------------------|-------------------------------------------------------------------------------------------------------|------------------------------------------------------------------------------------------------------------------------------------------|------|
|                      |                                                                               | activity                                                                      | activates AMPK, suppresses lipid/protein biosynthesis, and induces ROS/ER stress, cell-cycle arrest and apoptosis                                               | MDA-MB-453 xenograft-bearing female BALB/c nude mice                                             | BT-474, and 31.74 $\mu\text{M}$ in MCF-10A cells; <i>in vivo</i> : 35 mg/kg i.p.                                                               | breast cancer cells; inhibited HUVEC angiogenic activity <i>in vitro</i>                                    | obvious body-weight loss                                                                              | low/ADC-resistance relevance require further validation                                                                                  |      |
| Optimized derivative | Semisynthetic abietane analogues, including tanshinone and carnosol analogues | C18-functionalized ferruginol, ortho-quinone and catechol analogues           | Inhibit proliferation and induce dose-dependent cell death with apoptosis-like morphology; precise mechanism remains undefined                                  | SUM149, MDA-MB-231, T47D, MCF-7 cells                                                            | Active analogues showed IC50 values of ~1.3-18.7 $\mu\text{M}$ after 72 h; TI vs. BJ cells ranged from 1 to 44                                 | Stronger activity was observed in TNBC models for selected compounds                                        | NR                                                                                                    | No <i>in vivo</i> efficacy, PK, solubility or detailed mechanistic validation                                                            | (68) |
| Optimized derivative | Extended ferruginol, tanshinone and carnosol analogue library                 | Ferruginol-, tanshinone- and carnosol-related abietane scaffold modifications | Inhibit proliferation and colony formation; induce mitochondrial depolarization and apoptosis-like morphology in selected assays                                | SUM149, MDA-MB-231, MCF-7 cells                                                                  | Active analogues showed IC50 values of ~1.3-13 $\mu\text{M}$ ; TI vs. BJ cells reached up to 43                                                | Compounds 10 and 11 showed stronger activity in TNBC models                                                 | NR                                                                                                    | <i>In vitro/in silico</i> evidence only; experimental PK, solubility, metabolic stability and <i>in vivo</i> efficacy remain unvalidated | (69) |
| Optimized derivative | TA12                                                                          | Tan IIA-based imidazole analogue                                              | Induces ROS-mediated DNA damage, $\gamma\text{H2AX/p53}$ activation, AKT inhibition, S-phase arrest and FAK/GSK3 $\beta$ /MMP9-associated anti-invasive effects | MDA-MB-231 cells, L02 cells; zebrafish xenograft model                                           | IC50: 13.2 $\pm$ 3.9 $\mu\text{M}$ in MDA-MB-231 and 49.1 $\pm$ 7.4 $\mu\text{M}$ in L02 cells; zebrafish exposure: 5 $\mu\text{M}$            | Most potent analogue against MDA-MB-231 cells in the TA01-TA12 series; improved activity vs. native Tan IIA | Suppressed MDA-MB-231 xenograft proliferation and metastatic dissemination in zebrafish               | Zebrafish and single-cell-line evidence; mammalian PK, toxicity and efficacy remain needed                                               | (54) |
| Optimized derivative | Compound 4                                                                    | Para-methylsulfinylphenyl-substituted Tan IIA imidazole derivative            | Stabilizes multiple G4 DNAs, including MYC, KRAS, VEGF, BCL2 and Tel-26; induces DNA damage, $\gamma\text{H2AX}$ accumulation and S-phase arrest                | MDA-MB-231, MCF-7, HeLa, HepG2, MCF-10A and HUVEC cells; zebrafish xenograft/angiogenesis models | IC50: 12.8 $\pm$ 5.3 $\mu\text{M}$ in MDA-MB-231 and 95.7 $\pm$ 12.14 $\mu\text{M}$ in MCF-10A cells; zebrafish assays used 5-20 $\mu\text{M}$ | G4-selective binding over dsDNA; safe index 7.48 vs. MCF-10A cells                                          | Suppressed MDA-MB-231 growth/metastasis and angiogenesis in zebrafish; inhibited HUVEC tube formation | Derivative-specific G4 mechanism; mammalian PK, toxicity and target engagement remain unvalidated                                        | (67) |

|                         |                     |                                                                                             |                                                                                                                                                              |                                                                          |                                                                                                                                                 |                                                                                                                                                           |                                                                                                                                                        |                                                                                                                                          |      |
|-------------------------|---------------------|---------------------------------------------------------------------------------------------|--------------------------------------------------------------------------------------------------------------------------------------------------------------|--------------------------------------------------------------------------|-------------------------------------------------------------------------------------------------------------------------------------------------|-----------------------------------------------------------------------------------------------------------------------------------------------------------|--------------------------------------------------------------------------------------------------------------------------------------------------------|------------------------------------------------------------------------------------------------------------------------------------------|------|
| Delivery system         | T/CM-L              | Sequential-release liposomes co-loaded with STS and celastrol-loaded coix oil microemulsion | STS is released first to normalize tumor vessels and reduce TAFs, followed by celastrol/coix oil release for tumor cell killing                              | MCF-7 cells, L-02 cells; MCF-7 xenograft-bearing female BALB/c nude mice | IC50 in MCF-7 cells:<br>1.52±0.09 µM at 24 h and 0.64±0.04 µM at 48 h; <i>in vivo</i> : STS 5 mg/kg and celastrol 2 mg/kg once every two days   | Sequential release improved tumor microenvironment modulation and reduced celastrol-related systemic toxicity                                             | Tumor inhibition rate of 71.5%; increased tumor apoptosis and reduced Ki-67-positive proliferation                                                     | Complex multicomponent formulation; long-term safety, organ accumulation and manufacturability require further validation                | (23) |
| Delivery system         | Tan-Dox-MSN         | Tan-NH <sub>2</sub> -grafted mesoporous silica nanoparticles loaded with doxorubicin        | Enhances ER-associated uptake and doxorubicin delivery through receptor-mediated endocytosis                                                                 | MCF-7, T47D, MCF-10A cells; female BALB/c nude mice                      | <i>In vitro</i> : Dox-equivalent concentrations varied by assay; cellular uptake commonly assessed at Dox 5 µg/ml; <i>in vivo</i> : Dox 2 mg/kg | Improved tumor targeting, high Dox loading, enhanced tumor accumulation and reduced liver/cardiac toxicity indicators compared with free Dox formulations | Suppressed MCF-7 xenograft tumor growth in female BALB/c nude mice; Tan-NH <sub>2</sub> /Tan-MSN inhibited T47D migration and invasion <i>in vitro</i> | ER expression in normal tissues and nanocarrier immunogenicity, organ accumulation and long-term tolerability require further evaluation | (22) |
| Delivery-related ligand | Tan-NH <sub>2</sub> | Terminal amino-modified Tan IIA derivative used as an ER-associated targeting ligand        | Serves as a phytoestrogen-derived targeting ligand; supports ER-associated nanoparticle uptake and shows anti-migration/anti-invasion activity in T47D cells | MCF-7, T-47D, MCF-10A cells                                              | Cytotoxicity tested at 1-50 µg/ml; migration/invasion assays used 1, 2 and 5 µg/ml                                                              | Good biocompatibility toward MCF-10A cells within the tested range; supports construction of Tan-Dox-MSN and Tan-MSN systems                              | Evaluated <i>in vivo</i> as part of Tan-Dox-MSN/Tan-MSN formulations rather than as a standalone therapeutic agent                                     | Tumor specificity may be limited by ER expression in normal tissues; endocrine-related safety requires evaluation                        | (22) |

This table distinguishes cytotoxic potency from broader drug-likeness and translational feasibility. TAFs, tumor-associated fibroblasts. Tan IIA, tanshinone IIA; ATA, acetyltanshinone IIA; HTA, hydroquinone tanshinone IIA; STS, sodium tanshinone IIA sulfonate; CM, celastrol; MSN, mesoporous silica nanoparticles; Dox, doxorubicin; G4, G-quadruplex; ADC, antibody-drug conjugate; PK/PD, pharmacokinetic/pharmacodynamic; ER, estrogen receptor; NR, not reported in the cited breast cancer study or not sufficiently specified for direct quantitative comparison.
